# Supplementary material for: A novel aqueous ammonium dual-ion battery based on organic polymers
Source: Royal Society of Chemistry journal article supplement (doi:10.1039/c9ta00254e), 2019-01-01
Supplement: c9ta00254e1.pdf [file c9ta00254e1.pdf]

## Supporting information

### A novel aqueous ammonium dual-ion battery based on organic polymers

Yadi Zhang<sup>a</sup>, Yufeng An<sup>a</sup>, Bo Yin<sup>b</sup>, Jiangmin Jiang<sup>a</sup>, Shengyang Dong<sup>a</sup>, Hui Dou<sup>a</sup>,  
Xiaogang Zhang<sup>a\*</sup>

<sup>a</sup> Jiangsu Key Laboratory of Electrochemical Energy Storage Technologies, College of Material Science and Engineering, Nanjing University of Aeronautics and Astronautics, Nanjing 210016, China.

<sup>b</sup> College of Chemistry & Chemical engineering, Lanzhou University, Lanzhou 730000, China.

(\*E-mail address: [azhangxg@nuaa.edu.cn](mailto:azhangxg@nuaa.edu.cn))

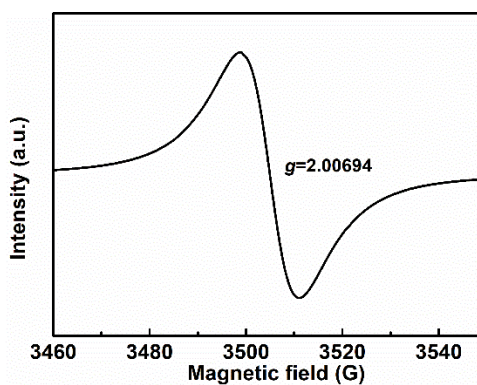

Fig. S1 ESR spectrum of the powder sample of PTMA.

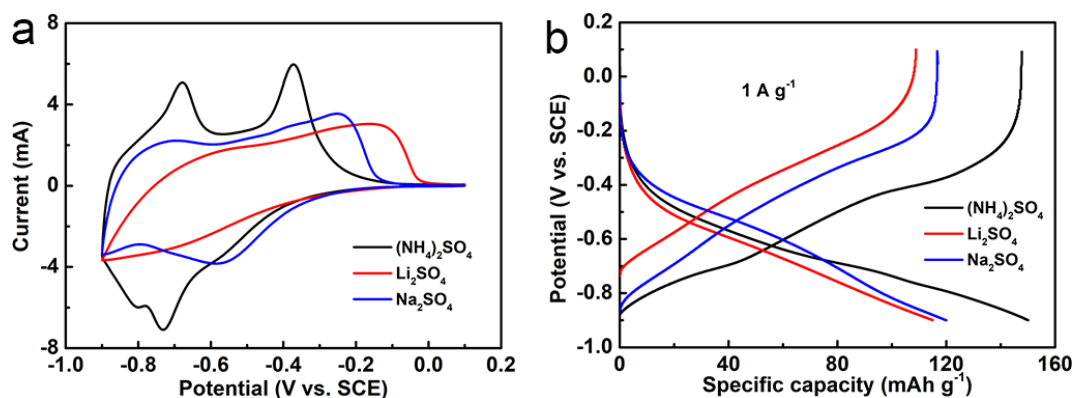

**Fig. S2.** (a) CV curves of PI anode in different electrolytes with a scan rate of  $2 \text{ mV s}^{-1}$ , and (b) charge-discharge curves of PI anode in different electrolytes with a current density of  $1 \text{ A g}^{-1}$ .

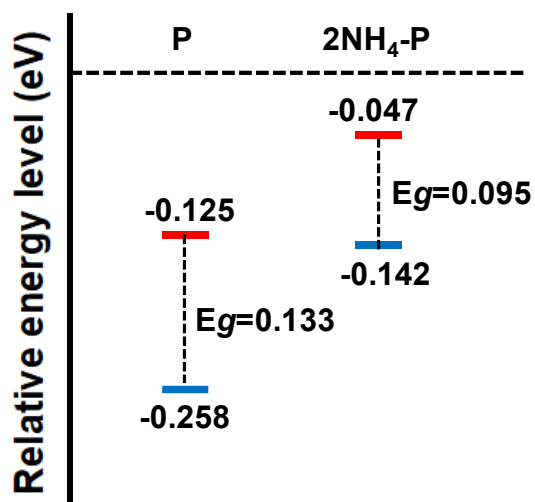

**Fig. S3.** The HOMO-LUMO gap for P and 2NH<sub>4</sub>-P.

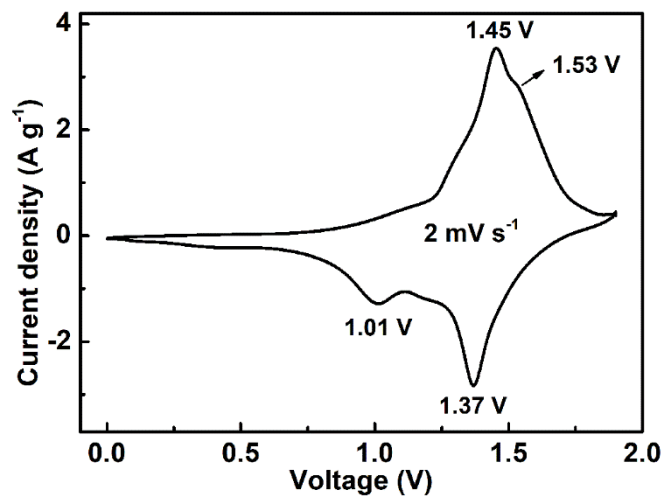

**Fig. S4.** CV curve of PI//PTMA ADIB at a scan rate of  $2 \text{ mV s}^{-1}$ .

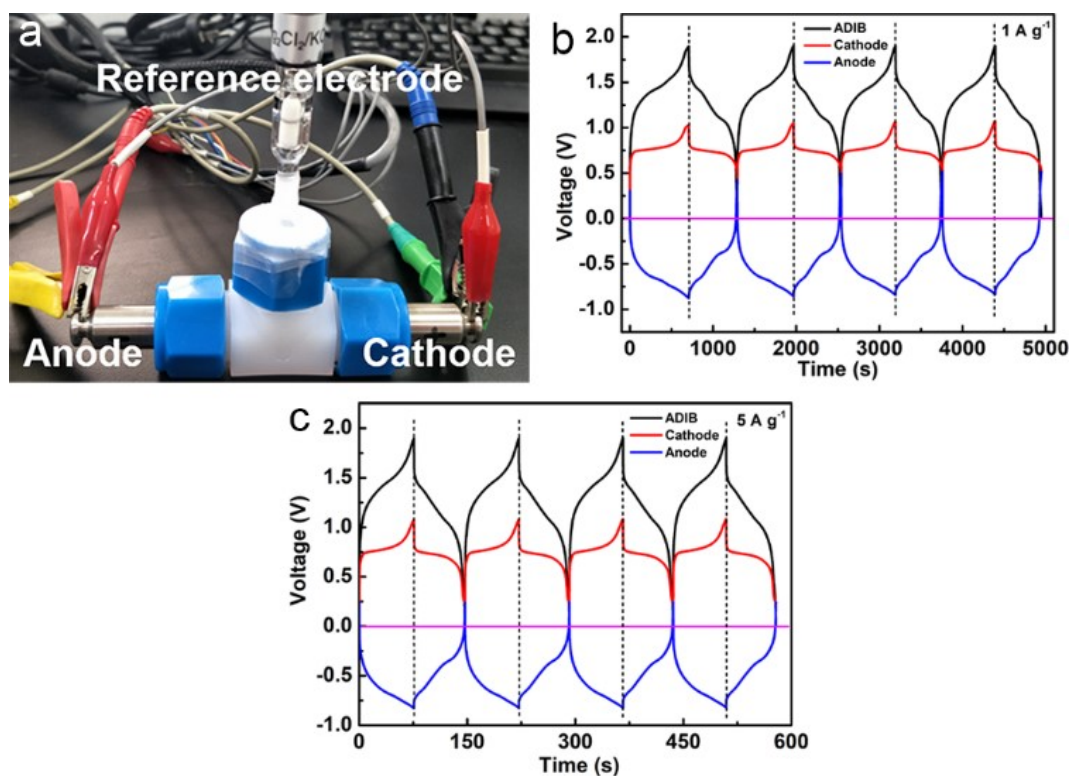

**Fig. S5.** (a) Photograph of Swagelok™ T-cell for the real-time investigation of voltage, and (b, c) the relationship between voltages of PI anode, PTMA cathode and full ADIB and test time at current densities of  $1 \text{ A g}^{-1}$  and  $5 \text{ A g}^{-1}$ , respectively.

**Table S1.** Cartesian coordinates (in Å) for optimized structures of P,  $\text{NH}_4^+$  and  $2\text{NH}_4^-$  P at M06/6-31+G(d, p).

**P:**

| Center number | Atomic number | Atomic type | Coordinates (Angstroms) |          |           |
|---------------|---------------|-------------|-------------------------|----------|-----------|
|               |               |             | X                       | Y        | Z         |
| 1             | 6             | 0           | 1.40375                 | 1.23647  | 1.10E-05  |
| 2             | 6             | 0           | 0.71046                 | 0.00189  | 4.00E-06  |
| 3             | 6             | 0           | -0.71046                | -0.00189 | 6.00E-06  |
| 4             | 6             | 0           | -1.4091                 | 1.22921  | 0         |
| 5             | 6             | 0           | -0.71018                | 2.42569  | 1.00E-06  |
| 6             | 6             | 0           | 0.69771                 | 2.42918  | 1.10E-05  |
| 7             | 6             | 0           | 1.4091                  | -1.22921 | 1.00E-05  |
| 8             | 6             | 0           | 0.71018                 | -2.42569 | 7.00E-06  |
| 9             | 6             | 0           | -0.69771                | -2.42918 | -5.00E-06 |
| 10            | 6             | 0           | -1.40375                | -1.23647 | -4.00E-06 |
| 11            | 6             | 0           | -2.89173                | -1.25924 | -5.00E-06 |

|    |   |   |          |          |           |
|----|---|---|----------|----------|-----------|
| 12 | 7 | 0 | -3.53722 | -0.01067 | 8.00E-06  |
| 13 | 6 | 0 | -2.89552 | 1.23624  | -1.00E-06 |
| 14 | 6 | 0 | 2.89173  | 1.25924  | 8.00E-06  |
| 15 | 7 | 0 | 3.53722  | 0.01067  | -7.00E-06 |
| 16 | 6 | 0 | 2.89552  | -1.23624 | 1.70E-05  |
| 17 | 8 | 0 | -3.55004 | 2.26812  | -3.00E-05 |
| 18 | 8 | 0 | -3.52417 | -2.30457 | -1.90E-05 |
| 19 | 8 | 0 | 3.52417  | 2.30457  | 1.10E-05  |
| 20 | 8 | 0 | 3.55004  | -2.26812 | 1.30E-05  |
| 21 | 6 | 0 | 5.00546  | -0.0182  | -3.80E-05 |
| 22 | 6 | 0 | -5.00546 | 0.01819  | 1.90E-05  |
| 23 | 1 | 0 | -1.26964 | 3.35513  | -5.00E-06 |
| 24 | 1 | 0 | 1.25208  | 3.36153  | 1.70E-05  |
| 25 | 1 | 0 | 1.26964  | -3.35513 | 1.30E-05  |
| 26 | 1 | 0 | -1.25208 | -3.36153 | -1.40E-05 |
| 27 | 1 | 0 | 5.35677  | 1.01082  | -1.38E-04 |
| 28 | 1 | 0 | 5.36372  | -0.54747 | 0.88598   |
| 29 | 1 | 0 | 5.36365  | -0.54765 | -0.88597  |
| 30 | 1 | 0 | -5.35677 | -1.01083 | 1.04E-04  |
| 31 | 1 | 0 | -5.36367 | 0.54763  | 0.88595   |
| 32 | 1 | 0 | -5.36371 | 0.54748  | -0.886    |
| 1  | 6 | 0 | 1.40375  | 1.23647  | 1.10E-05  |

**NH<sub>4</sub><sup>+</sup>:**

| Center number | Atomic number | Atomic type | Coordinates (Angstroms) |          |          |
|---------------|---------------|-------------|-------------------------|----------|----------|
|               |               |             | X                       | Y        | Z        |
| 1             | 7             | 0           | 9E-6                    | 8E-6     | 4E-6     |
| 2             | 1             | 0           | 0.13318                 | -0.7729  | -0.6634  |
| 3             | 1             | 0           | -0.32727                | 0.8324   | -0.50519 |
| 4             | 1             | 0           | -0.69778                | -0.26954 | 0.70402  |
| 5             | 1             | 0           | 0.89181                 | 0.20999  | 0.46453  |

**2NH<sub>4</sub>-P:**

| Center number | Atomic number | Atomic type | Coordinates (Angstroms) |          |          |
|---------------|---------------|-------------|-------------------------|----------|----------|
|               |               |             | X                       | Y        | Z        |
| 1             | 6             | 0           | -0.92787                | 1.61172  | 0.19627  |
| 2             | 6             | 0           | -0.67215                | 0.24968  | -0.03088 |
| 3             | 6             | 0           | 0.67811                 | -0.24453 | 0.03919  |
| 4             | 6             | 0           | 1.7392                  | 0.67346  | 0.3405   |
| 5             | 6             | 0           | 1.42286                 | 2.0461   | 0.63864  |
| 6             | 6             | 0           | 0.13965                 | 2.49664  | 0.55691  |
| 7             | 6             | 0           | -1.73313                | -0.66876 | -0.33111 |
| 8             | 6             | 0           | -1.41658                | -2.04093 | -0.62995 |
| 9             | 6             | 0           | -0.13302                | -2.49086 | -0.55053 |

|    |   |   |          |          |          |
|----|---|---|----------|----------|----------|
| 10 | 6 | 0 | 0.93425  | -1.60611 | -0.18961 |
| 11 | 6 | 0 | 2.27835  | -2.1342  | -0.09716 |
| 12 | 7 | 0 | 3.29129  | -1.16021 | 0.1601   |
| 13 | 6 | 0 | 3.04337  | 0.17251  | 0.33873  |
| 14 | 6 | 0 | -2.27092 | 2.14039  | 0.10059  |
| 15 | 7 | 0 | -3.28481 | 1.16563  | -0.15263 |
| 16 | 6 | 0 | -3.03742 | -0.16702 | -0.32922 |
| 17 | 8 | 0 | 2.58765  | -3.32069 | -0.24224 |
| 18 | 8 | 0 | -4.13526 | -0.91233 | -0.50948 |
| 19 | 8 | 0 | -2.58041 | 3.32702  | 0.24294  |
| 20 | 8 | 0 | 4.13949  | 0.91938  | 0.52365  |
| 21 | 6 | 0 | 4.67984  | -1.63283 | 0.202    |
| 22 | 6 | 0 | -4.6734  | 1.63853  | -0.191   |
| 23 | 1 | 0 | -5.25843 | 1.1536   | 0.59442  |
| 24 | 1 | 0 | -5.12562 | 1.40322  | -1.15721 |
| 25 | 1 | 0 | -4.63837 | 2.71475  | -0.03555 |
| 26 | 1 | 0 | 5.12438  | -1.41237 | 1.17541  |
| 27 | 1 | 0 | 5.27059  | -1.13503 | -0.57079 |
| 28 | 1 | 0 | 4.64679  | -2.70662 | 0.03013  |
| 29 | 1 | 0 | -2.20771 | -2.70161 | -0.96819 |
| 30 | 1 | 0 | 2.21447  | 2.70593  | 0.97814  |
| 31 | 1 | 0 | 0.12721  | -3.51771 | -0.78332 |
| 32 | 1 | 0 | -0.12014 | 3.52412  | 0.7875   |
| 33 | 7 | 0 | -4.04838 | -3.25356 | 0.89107  |
| 34 | 1 | 0 | -3.09436 | -3.44795 | 1.19445  |
| 35 | 1 | 0 | -4.61266 | -3.1217  | 1.72937  |
| 36 | 1 | 0 | -4.39227 | -4.09494 | 0.43008  |
| 37 | 1 | 0 | -4.03959 | -1.82326 | -0.08032 |
| 38 | 7 | 0 | 4.00571  | 3.21242  | -0.94873 |
| 39 | 1 | 0 | 4.57413  | 3.10432  | -1.78767 |
| 40 | 1 | 0 | 4.05432  | 1.81748  | 0.06452  |
| 41 | 1 | 0 | 3.0386   | 3.33661  | -1.2476  |
| 42 | 1 | 0 | 4.29352  | 4.08145  | -0.50128 |
| 1  | 6 | 0 | -0.92787 | 1.61172  | 0.19627  |

**Table S2.** The comparison of oxidation and reduction peaks of anode, cathode and full ADIB at a scan rate of 2 mV s<sup>-1</sup>.

|       | Oxidation peaks (V) |       | Reduction peaks (V) |       |
|-------|---------------------|-------|---------------------|-------|
| Anode | -0.67               | -0.37 | -0.70               | -0.79 |

| Cathode           | 0.78 |      | 0.68  |      |
|-------------------|------|------|-------|------|
| Theoretical ADIB  | 1.48 | 1.57 | 1.35  | 1.05 |
| Practical ADIB    | 1.45 | 1.53 | 1.37  | 1.01 |
| Difference values | 0.03 | 0.04 | -0.02 | 0.04 |

**Table S3.** A summary of some aqueous storage systems based on  $\text{Li}^+$ ,  $\text{Na}^+$   $\text{Mg}^{2+}$  and  $\text{NH}_4^+$ .

| System                                                                 | Cell voltage (V) | Energy density ( $\text{Wh kg}^{-1}$ ) | Power density ( $\text{kW kg}^{-1}$ ) | Cycle stability (%)/cycle number | Ref. |
|------------------------------------------------------------------------|------------------|----------------------------------------|---------------------------------------|----------------------------------|------|
| PNFE// $\text{LiMn}_2\text{O}_4$                                       | 2.4              | 76.1                                   | 12.610                                | 65.5/1000                        | 1    |
| $\text{NaTi}_2(\text{PO}_4)_3$ // $\text{K}_{0.27}\text{MnO}_2$        | 1.6              | ---                                    | ---                                   | 83/100                           | 2    |
| PNTCDA//PTPAn                                                          | 2.1              | 52.8                                   | 32.0                                  | 85/700                           | 3    |
| PI/AC// $\text{LiMn}_2\text{O}_4$                                      | 1.75             | 51                                     | ---                                   | 89/450                           | 4    |
| PBN//polyimide                                                         | 1.55             | 45                                     | ---                                   | 60/5000                          | 5    |
| PNTCDA// $\text{I}^-/\text{I}_3^-$                                     | 1.6              | 65.3                                   | ---                                   | 70/50 000                        | 6    |
|                                                                        | 1.6              | 63.8                                   | ---                                   | 70/50 000                        |      |
| Polyimide// $\text{LiMn}_2\text{O}_4$                                  | 2.5              | 48.93                                  | 10.217                                | 98/1000                          | 7    |
| PTCDI// $(\text{NH}_4)_{1.47}\text{Ni}[\text{Fe}(\text{CN})_6]_{0.88}$ | 1.9              | 43                                     | ---                                   | 67/1000                          | 8    |
| $\text{Mo}_6\text{S}_8$ // $\text{LiMn}_2\text{O}_4$                   | 2.3              | 84                                     | ---                                   | 68/1000                          | 9    |
| PI//PTMA                                                               | 1.9              | 51.3                                   | 15.8                                  | 86.3/10 000                      | This |

## References

- 1 Y. Wang, X. Cui, Y. Zhang, L. Zhang, X. Gong and G. Zheng, *Adv. Mater.*, 2016, **28**, 7626–7632.
- 2 Y. Liu, Y. Qiao, X. Lou, X. Zhang, W. Zhang and Y. Huang, *ACS Appl. Mater. Inter.*,

- 2016, **8**, 14564–14571.
- 3 X. Dong, H. Yu, Y. Ma, J. L. Bao, D. G. Truhlar, Y. Wang and Y. Xia, *Chemistry*, 2017, **23**, 2560–2565.
  - 4 Z. Guo, L. Chen, Y. Wang, C. Wang and Y. Xia, *ACS Sustain. Chem. Eng.*, 2017, **5**, 1503–1508.
  - 5 L. Chen, J. L. Bao, X. Dong, D. G. Truhlar, Y. Wang, C. Wang and Y. Xia, *ACS Energy Lett.*, 2017, **2**, 1115–1121.
  - 6 X. Dong, L. Chen, J. Liu, S. Haller, Y. Wang and Y. Xia, *Sci. Adv.*, 2016, **2**, e1501038.
  - 7 Y. Zhang, Y. Wang, L. Wang, C.-M. Lo, Y. Zhao, Y. Jiao, G. Zheng and H. Peng, *J. Mater. Chem. A*, 2016, **4**, 9002–9008.
  - 8 X. Wu, Y. Qi, J. J. Hong, Z. Li, A. S. Hernandez and X. Ji, *Angew. Chem. Int. Ed.*, 2017, **56**, 13026–13030.
  - 9 L. Suo, O. Borodin, T. Gao, M. Olguin, J. Ho, X. Fan, C. Luo, C. Wang and K. Xu, *Science*, 2015, **350**, 938–943.
